# Supplementary material
Source: PubMed Central journal article supplement (PMC3352276)
Supplement: supp_157.11.3232_SupplementaryMaterial.pdf [file supp_157.11.3232_SupplementaryMaterial.pdf]

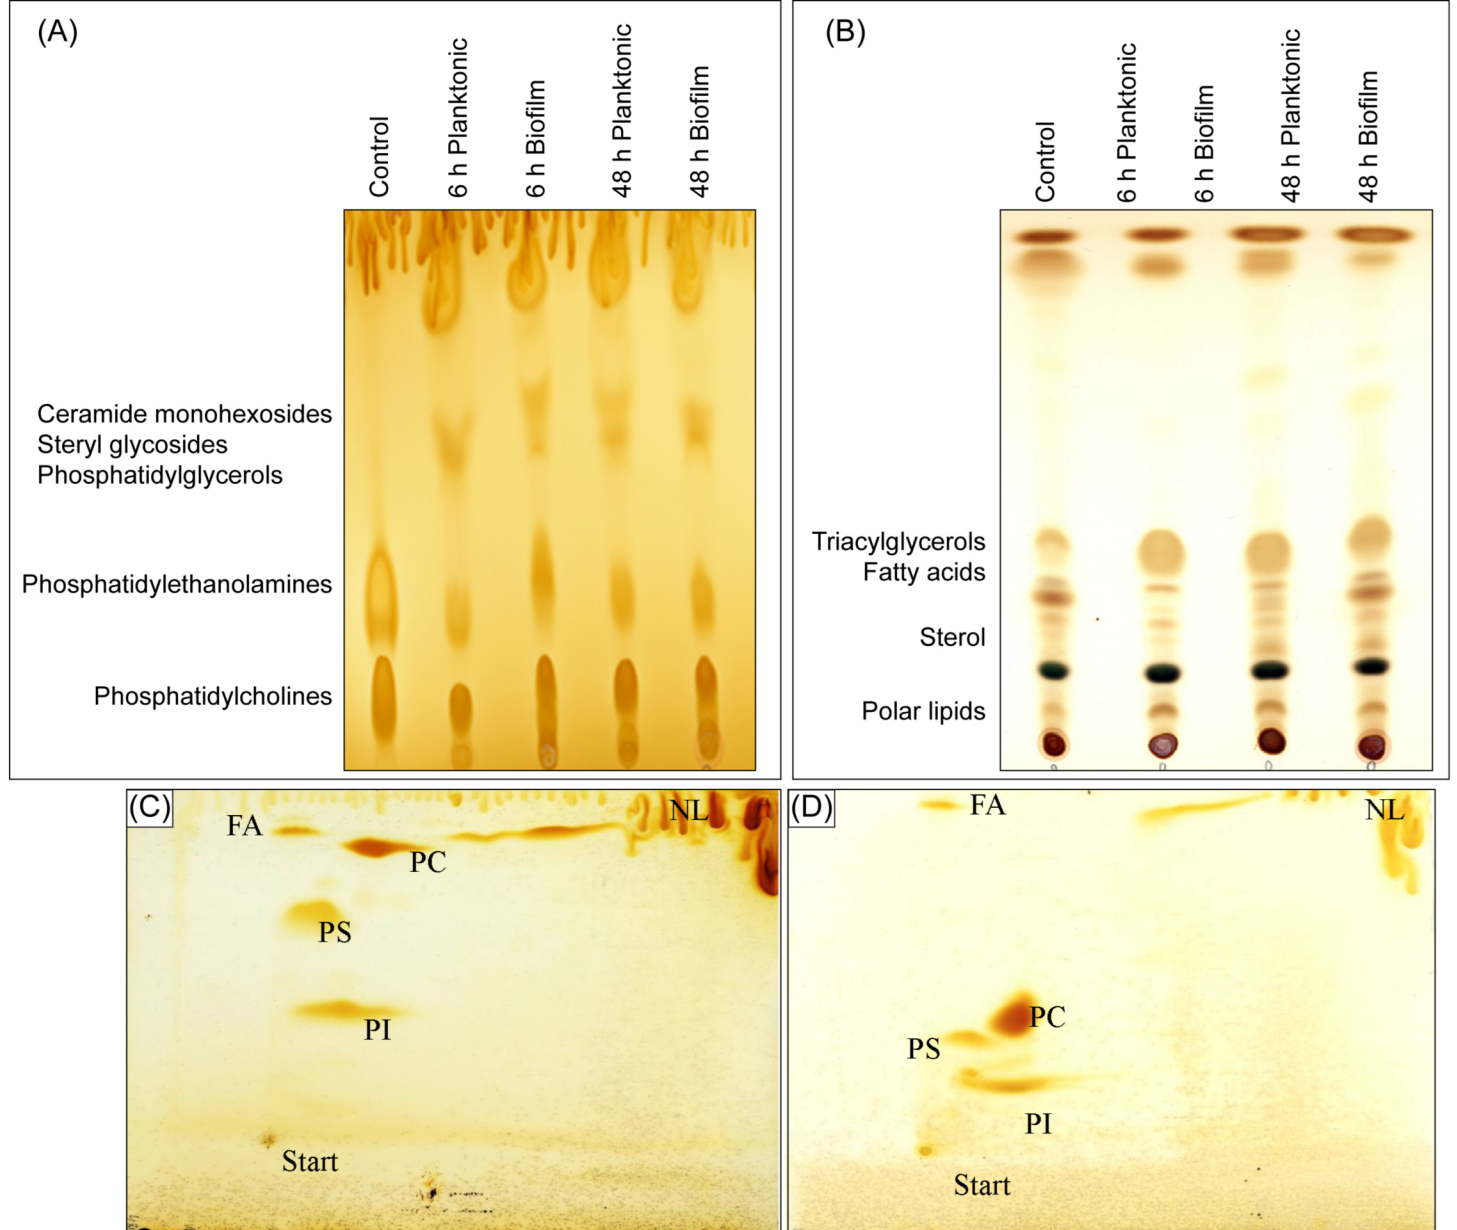

**Figure S1. Thin layer chromatography analysis of *C. albicans* biofilms and planktonic cells.** Representative one-dimensional TLC plates for (A) polar and (B) apolar lipids are shown. Panels (C) and (D) show representative two-dimensional TLC plates for lipids isolated from biofilms grown to early phase and mature phase, respectively. Polar lipids were separated using chloroform:methanol:7 M ammonia (65:25:4 v/v), while apolar lipids were extracted with hexane:diethylether:acetic acid (90:10:1, v/v) solvent; lipids were visualization by iodine vapor. PC: phosphatidylcholine, PE: phosphatidylethanolamine, PS: phosphatidylserine; PI: phosphatidylinositol; FA: Fatty acids, NL: Neutral Lipids.

**Table S1.** Profiles of lipid species in early- and late-phase biofilm and planktonic cells

| Lipid Species | Acyl carbon | Early Phase (nmol/g biofilm biomass) |          |            |           | Mature Phase (nmol/g biofilm biomass) |          |            |         |
|---------------|-------------|--------------------------------------|----------|------------|-----------|---------------------------------------|----------|------------|---------|
|               |             | Biofilm                              |          | Planktonic |           | Biofilm                               |          | Planktonic |         |
|               |             | Mean                                 | SE       | Mean       | SE        | Mean                                  | SE       | Mean       | SE      |
| LPC           | 14:0        | 0.260                                | 0.260    | 2.788      | 1.432     | 20.014                                | 6.145    | 34.060     | 9.005   |
|               | 14:1        | 0.000                                | 0.000    | 0.000      | 0.000     | 5.324                                 | 5.324    | 0.252      | 0.154   |
|               | 15:0        | 0.126                                | 0.126    | 0.000      | 0.000     | 3.642                                 | 3.433    | 1.646      | 0.432   |
|               | 15:1        | 0.000                                | 0.000    | 0.000      | 0.000     | 1.158                                 | 1.158    | 1.224      | 0.443   |
|               | 16:0        | 9.600                                | 1.913    | 21.716     | 11.335    | 101.404                               | 14.669   | 217.814    | 48.724  |
|               | 16:1        | 28.928                               | 4.300    | 30.008     | 11.880    | 81.876                                | 12.898   | 85.082     | 19.355  |
|               | 17:0        | 0.376                                | 0.376    | 2.034      | 0.766     | 6.712                                 | 6.712    | 4.850      | 1.323   |
|               | 17:1        | 0.646                                | 0.275    | 0.510      | 0.340     | 8.834                                 | 6.507    | 5.044      | 1.235   |
|               | 18:0        | 1.814                                | 0.858    | 9.718      | 4.429     | 50.268                                | 22.149   | 101.200    | 26.671  |
|               | 18:1        | 18.444                               | 3.983    | 31.156     | 9.127     | 165.482                               | 21.203   | 179.344    | 43.531  |
|               | 18:2        | 29.040                               | 3.378    | 27.426     | 8.993     | 48.266                                | 8.507    | 86.934     | 22.963  |
| 18:3          | 1.694       | 0.352                                | 0.990    | 0.347      | 3.746     | 2.248                                 | 13.188   | 4.067      |         |
| PC            | 26:0        | 1.998                                | 1.067    | 7.092      | 2.888     | 183.366                               | 140.154  | 38.662     | 4.228   |
|               | 26:1        | 1.122                                | 0.828    | 6.024      | 2.411     | 43.274                                | 33.324   | 6.344      | 1.709   |
|               | 28:0        | 1.476                                | 0.458    | 11.994     | 4.312     | 522.642                               | 125.000  | 149.150    | 23.592  |
|               | 28:1        | 2.522                                | 0.678    | 15.360     | 5.184     | 197.904                               | 48.025   | 54.096     | 6.183   |
|               | 30:0        | 8.054                                | 2.491    | 45.300     | 18.445    | 1223.132                              | 232.246  | 187.684    | 20.492  |
|               | 30:1        | 159.742                              | 41.415   | 275.522    | 105.336   | 1563.004                              | 289.598  | 497.140    | 79.688  |
|               | 30:2        | 37.402                               | 13.796   | 47.736     | 16.419    | 175.890                               | 41.958   | 52.368     | 5.863   |
|               | 31:0        | 0.000                                | 0.000    | 13.302     | 4.762     | 160.582                               | 119.888  | 30.276     | 5.537   |
|               | 31:1        | 90.736                               | 26.946   | 58.206     | 22.532    | 313.278                               | 44.877   | 107.680    | 19.569  |
|               | 31:2        | 31.686                               | 11.285   | 23.128     | 9.537     | 76.084                                | 16.945   | 35.012     | 6.774   |
|               | 32:0        | 26.362                               | 17.948   | 99.958     | 36.825    | 620.870                               | 102.131  | 196.438    | 46.636  |
|               | 32:1        | 1736.338                             | 348.978  | 1619.706   | 607.588   | 9189.230                              | 1445.211 | 2187.298   | 391.557 |
|               | 32:2        | 3876.618                             | 984.777  | 1302.668   | 460.838   | 7370.090                              | 1315.975 | 1609.910   | 334.953 |
|               | 33:0        | 4.424                                | 2.227    | 11.940     | 4.753     | 208.638                               | 136.749  | 30.740     | 6.252   |
|               | 33:1        | 229.534                              | 46.193   | 195.634    | 76.693    | 1210.086                              | 166.808  | 312.790    | 64.242  |
|               | 33:2        | 797.012                              | 188.115  | 240.392    | 94.246    | 1029.002                              | 187.217  | 316.708    | 69.285  |
|               | 34:1        | 1826.548                             | 441.890  | 2069.168   | 745.079   | 14477.248                             | 2113.030 | 3712.542   | 821.979 |
| 34:2          | 7271.424    | 1724.882                             | 3908.980 | 1387.815   | 35065.242 | 7225.713                              | 7213.326 | 1641.325   |         |
| 34:3          | 7866.580    | 2086.498                             | 2524.718 | 921.472    | 9001.384  | 2293.079                              | 2580.536 | 669.631    |         |
| 34:4          | 1683.384    | 487.276                              | 408.782  | 156.520    | 733.938   | 172.624                               | 323.904  | 80.450     |         |

Supplementary Table ST1

| Lipid Species | Acyl carbon | Early Phase (nmol/g biofilm biomass) |          |            |         | Mature Phase (nmol/g biofilm biomass) |          |            |         |
|---------------|-------------|--------------------------------------|----------|------------|---------|---------------------------------------|----------|------------|---------|
|               |             | Biofilm                              |          | Planktonic |         | Biofilm                               |          | Planktonic |         |
|               |             | Mean                                 | SE       | Mean       | SE      | Mean                                  | SE       | Mean       | SE      |
|               | 36:1        | 682.304                              | 151.626  | 800.540    | 272.815 | 4775.560                              | 633.963  | 1380.030   | 267.875 |
|               | 36:2        | 2723.570                             | 628.074  | 1740.696   | 616.121 | 23161.440                             | 5325.557 | 4070.552   | 886.526 |
|               | 36:3        | 4552.006                             | 1190.847 | 2017.812   | 717.293 | 13228.696                             | 3505.691 | 3175.832   | 783.121 |
|               | 36:4        | 4499.338                             | 1298.402 | 1527.160   | 555.854 | 4377.692                              | 1267.736 | 1565.418   | 428.498 |
|               | 36:5        | 1596.622                             | 571.031  | 387.148    | 149.786 | 375.156                               | 89.358   | 244.796    | 69.590  |
|               | 36:6        | 145.552                              | 61.294   | 52.304     | 22.536  | 159.620                               | 66.087   | 54.622     | 15.935  |
|               | 38:2        | 88.098                               | 19.539   | 89.050     | 32.687  | 941.622                               | 168.561  | 239.792    | 46.262  |
|               | 38:3        | 195.344                              | 48.538   | 174.914    | 62.334  | 656.886                               | 194.337  | 383.748    | 106.792 |
|               | 38:4        | 97.518                               | 28.848   | 253.846    | 99.434  | 200.068                               | 35.588   | 497.424    | 148.569 |
|               | 38:5        | 67.432                               | 25.353   | 200.404    | 75.245  | 157.064                               | 33.270   | 435.650    | 134.300 |
|               | 38:6        | 34.200                               | 10.567   | 153.568    | 55.985  | 229.098                               | 123.077  | 264.600    | 79.477  |
|               | 40:2        | 3.162                                | 1.368    | 4.844      | 1.430   | 55.866                                | 20.984   | 16.294     | 5.447   |
|               | 40:3        | 0.784                                | 0.466    | 2.218      | 1.250   | 23.640                                | 11.780   | 11.870     | 7.253   |
|               | 40:4        | 1.402                                | 1.144    | 30.686     | 12.229  | 38.986                                | 33.466   | 47.298     | 13.109  |
|               | 40:5        | 4.016                                | 2.081    | 107.878    | 33.328  | 119.816                               | 67.566   | 307.114    | 94.826  |
| LPE           | 14:1        | 0.000                                | 0.000    | 0.000      | 0.000   | 1.562                                 | 1.562    | 0.000      | 0.000   |
|               | 15:0        | 0.236                                | 0.236    | 0.236      | 0.236   | 1.498                                 | 1.122    | 0.570      | 0.430   |
|               | 15:1        | 0.000                                | 0.000    | 0.000      | 0.000   | 0.000                                 | 0.000    | 0.000      | 0.000   |
|               | 16:0        | 79.710                               | 16.975   | 26.722     | 12.317  | 111.836                               | 13.428   | 81.224     | 21.215  |
|               | 16:1        | 103.788                              | 24.304   | 13.598     | 5.763   | 35.288                                | 16.313   | 24.394     | 6.421   |
|               | 17:0        | 0.410                                | 0.256    | 0.000      | 0.000   | 1.960                                 | 1.570    | 0.626      | 0.626   |
|               | 17:1        | 5.554                                | 2.011    | 0.000      | 0.000   | 0.850                                 | 0.850    | 1.700      | 0.796   |
|               | 18:1        | 224.106                              | 56.831   | 30.842     | 11.770  | 136.048                               | 48.022   | 92.238     | 27.963  |
|               | 18:2        | 96.016                               | 25.237   | 13.436     | 4.612   | 30.758                                | 10.558   | 21.278     | 5.242   |
|               | 18:3        | 13.926                               | 3.589    | 0.236      | 0.236   | 0.742                                 | 0.332    | 0.126      | 0.126   |
|               | 20:0        | 0.166                                | 0.102    | 0.000      | 0.000   | 0.510                                 | 0.510    | 0.126      | 0.126   |
|               | 20:1        | 0.174                                | 0.174    | 0.000      | 0.000   | 5.150                                 | 4.528    | 0.126      | 0.126   |
| PE            | 26:0        | 0.126                                | 0.126    | 1.896      | 1.014   | 41.850                                | 33.271   | 3.970      | 0.685   |
|               | 26:1        | 0.362                                | 0.238    | 0.360      | 0.277   | 8.560                                 | 7.712    | 0.702      | 0.146   |
|               | 28:1        | 4.228                                | 1.559    | 6.272      | 2.673   | 38.928                                | 8.715    | 9.110      | 1.466   |
|               | 30:0        | 6.916                                | 1.433    | 14.612     | 5.934   | 192.106                               | 30.179   | 19.684     | 3.338   |
|               | 30:1        | 84.268                               | 22.344   | 46.910     | 21.091  | 389.562                               | 82.259   | 60.488     | 7.384   |

Supplementary Table ST1

| Lipid Species | Acyl carbon | Early Phase (nmol/g biofilm biomass) |          |            |         | Mature Phase (nmol/g biofilm biomass) |          |            |         |
|---------------|-------------|--------------------------------------|----------|------------|---------|---------------------------------------|----------|------------|---------|
|               |             | Biofilm                              |          | Planktonic |         | Biofilm                               |          | Planktonic |         |
|               |             | Mean                                 | SE       | Mean       | SE      | Mean                                  | SE       | Mean       | SE      |
|               | 30:2        | 24.324                               | 7.049    | 13.426     | 5.246   | 47.702                                | 9.633    | 12.132     | 2.058   |
|               | 31:0        | 0.000                                | 0.000    | 0.000      | 0.000   | 12.384                                | 9.075    | 0.000      | 0.000   |
|               | 31:1        | 70.854                               | 18.196   | 15.488     | 7.190   | 106.176                               | 18.226   | 13.622     | 1.242   |
|               | 31:2        | 15.336                               | 3.945    | 2.468      | 1.587   | 11.356                                | 2.826    | 1.172      | 0.420   |
|               | 32:0        | 20.996                               | 8.831    | 10.044     | 4.200   | 144.820                               | 34.594   | 7.938      | 1.543   |
|               | 32:1        | 2276.158                             | 560.382  | 693.014    | 278.505 | 4983.290                              | 964.803  | 630.224    | 81.205  |
|               | 32:2        | 2013.668                             | 519.240  | 367.214    | 154.235 | 2270.806                              | 594.356  | 322.928    | 54.087  |
|               | 33:0        | 0.260                                | 0.260    | 0.000      | 0.000   | 14.004                                | 8.767    | 0.422      | 0.291   |
|               | 33:1        | 462.310                              | 118.184  | 89.982     | 36.395  | 636.406                               | 85.989   | 75.552     | 12.250  |
|               | 33:2        | 599.092                              | 160.246  | 83.632     | 36.445  | 380.264                               | 81.550   | 57.052     | 10.828  |
|               | 34:0        | 0.000                                | 0.000    | 0.000      | 0.000   | 0.000                                 | 0.000    | 0.000      | 0.000   |
|               | 34:1        | 6371.148                             | 1639.997 | 1756.540   | 728.863 | 16239.628                             | 2319.973 | 1895.488   | 317.600 |
|               | 34:2        | 8065.392                             | 2281.983 | 2036.178   | 815.189 | 11894.478                             | 2777.191 | 1838.012   | 335.592 |
|               | 34:3        | 2867.584                             | 793.016  | 723.440    | 292.083 | 2588.896                              | 657.823  | 518.502    | 100.002 |
|               | 34:4        | 935.682                              | 287.933  | 129.766    | 54.186  | 299.236                               | 77.015   | 71.128     | 11.235  |
|               | 35:0        | 26.668                               | 6.461    | 1.896      | 1.147   | 66.574                                | 15.911   | 5.174      | 1.031   |
|               | 35:1        | 186.198                              | 47.713   | 32.032     | 13.385  | 300.566                               | 66.222   | 30.720     | 6.225   |
|               | 35:2        | 766.326                              | 194.505  | 106.306    | 43.821  | 795.510                               | 175.629  | 101.012    | 19.857  |
|               | 36:0        | 0.868                                | 0.868    | 0.236      | 0.236   | 7.114                                 | 6.903    | 0.126      | 0.126   |
|               | 36:1        | 903.876                              | 204.855  | 235.416    | 94.253  | 1879.902                              | 304.205  | 227.390    | 48.387  |
|               | 36:2        | 2876.088                             | 735.277  | 723.212    | 291.814 | 6867.960                              | 1615.693 | 1014.554   | 220.401 |
|               | 36:3        | 2676.868                             | 694.312  | 753.664    | 305.400 | 4142.938                              | 1122.442 | 759.746    | 184.854 |
|               | 36:4        | 2385.682                             | 698.010  | 566.862    | 229.222 | 1264.030                              | 340.909  | 322.522    | 76.390  |
|               | 36:5        | 1033.520                             | 372.000  | 204.870    | 89.157  | 210.352                               | 61.702   | 74.784     | 14.232  |
|               | 36:6        | 70.498                               | 24.489   | 11.378     | 4.571   | 19.790                                | 3.476    | 6.594      | 1.371   |
|               | 37:0        | 21.214                               | 5.080    | 6.014      | 3.030   | 30.514                                | 6.424    | 9.338      | 3.272   |
|               | 37:1        | 21.752                               | 5.253    | 3.666      | 2.420   | 62.012                                | 8.153    | 6.614      | 1.924   |
|               | 37:2        | 34.784                               | 11.556   | 5.470      | 2.839   | 82.764                                | 13.833   | 5.822      | 1.066   |
|               | 38:0        | 0.174                                | 0.174    | 0.000      | 0.000   | 6.720                                 | 3.966    | 0.378      | 0.154   |
|               | 38:1        | 2.710                                | 1.124    | 1.454      | 0.735   | 47.348                                | 14.595   | 1.524      | 0.800   |
|               | 38:2        | 52.788                               | 12.592   | 16.264     | 7.579   | 246.400                               | 50.008   | 25.000     | 4.841   |
|               | 38:3        | 34.390                               | 9.480    | 8.962      | 4.364   | 67.918                                | 12.075   | 12.334     | 3.910   |

Supplementary Table ST1

| Lipid Species | Acyl carbon | Early Phase (nmol/g biofilm biomass) |          |            |          | Mature Phase (nmol/g biofilm biomass) |          |            |         |
|---------------|-------------|--------------------------------------|----------|------------|----------|---------------------------------------|----------|------------|---------|
|               |             | Biofilm                              |          | Planktonic |          | Biofilm                               |          | Planktonic |         |
|               |             | Mean                                 | SE       | Mean       | SE       | Mean                                  | SE       | Mean       | SE      |
|               | 38:4        | 19.020                               | 4.967    | 12.792     | 7.663    | 24.800                                | 9.374    | 20.826     | 4.982   |
|               | 38:5        | 18.646                               | 4.994    | 24.248     | 11.207   | 45.308                                | 12.615   | 36.594     | 10.460  |
|               | 38:6        | 14.022                               | 6.276    | 16.162     | 8.873    | 20.676                                | 6.780    | 24.540     | 6.363   |
|               | 40:2        | 0.198                                | 0.198    | 0.170      | 0.170    | 1.572                                 | 0.590    | 0.200      | 0.129   |
|               | 40:3        | 0.000                                | 0.000    | 0.000      | 0.000    | 0.462                                 | 0.462    | 0.000      | 0.000   |
|               | 42:2        | 0.292                                | 0.126    | 0.456      | 0.294    | 18.588                                | 10.409   | 0.824      | 0.267   |
|               | 42:3        | 0.000                                | 0.000    | 0.000      | 0.000    | 0.972                                 | 0.460    | 0.000      | 0.000   |
|               | 42:4        | 0.000                                | 0.000    | 0.000      | 0.000    | 0.462                                 | 0.462    | 0.126      | 0.126   |
| PI            | 26:0        | 0.160                                | 0.160    | 0.000      | 0.000    | 34.614                                | 28.450   | 5.964      | 1.823   |
|               | 28:0        | 3.496                                | 1.501    | 15.576     | 8.845    | 38.584                                | 9.751    | 59.348     | 11.092  |
|               | 30:0        | 25.810                               | 6.702    | 44.916     | 27.729   | 155.706                               | 25.161   | 52.256     | 10.757  |
|               | 30:1        | 70.464                               | 19.800   | 44.354     | 19.994   | 84.824                                | 18.071   | 52.830     | 10.801  |
|               | 30:2        | 4.536                                | 1.271    | 0.774      | 0.353    | 0.260                                 | 0.260    | 0.626      | 0.626   |
|               | 31:0        | 0.000                                | 0.000    | 0.000      | 0.000    | 9.490                                 | 9.490    | 0.000      | 0.000   |
|               | 31:1        | 74.502                               | 19.868   | 13.906     | 8.143    | 42.992                                | 5.397    | 11.742     | 2.926   |
|               | 31:2        | 1.166                                | 0.522    | 0.286      | 0.286    | 0.462                                 | 0.462    | 0.450      | 0.233   |
|               | 32:0        | 20.164                               | 8.085    | 26.244     | 14.373   | 58.922                                | 14.333   | 16.354     | 6.006   |
|               | 32:1        | 2421.302                             | 590.993  | 1106.526   | 504.108  | 2972.690                              | 379.489  | 1489.830   | 242.336 |
|               | 32:2        | 453.706                              | 114.642  | 166.668    | 70.828   | 203.694                               | 52.926   | 140.012    | 28.310  |
|               | 33:0        | 0.876                                | 0.876    | 5.302      | 4.766    | 3.538                                 | 2.165    | 1.320      | 0.878   |
|               | 33:1        | 517.498                              | 131.154  | 67.542     | 39.624   | 428.648                               | 40.471   | 200.168    | 34.982  |
|               | 33:2        | 280.352                              | 70.733   | 52.236     | 21.432   | 69.902                                | 13.402   | 57.246     | 8.146   |
|               | 34:1        | 6127.076                             | 1492.497 | 2390.874   | 1058.895 | 16019.068                             | 1833.237 | 5791.668   | 757.122 |
|               | 34:2        | 7817.166                             | 2011.629 | 2256.110   | 942.781  | 5417.848                              | 1159.033 | 3357.566   | 459.650 |
|               | 34:3        | 963.140                              | 261.974  | 254.154    | 115.539  | 412.434                               | 102.221  | 305.706    | 46.363  |
|               | 34:4        | 49.188                               | 11.356   | 4.876      | 2.944    | 0.832                                 | 0.351    | 6.438      | 2.394   |
|               | 35:0        | 0.174                                | 0.174    | 1.186      | 1.186    | 12.254                                | 11.423   | 3.500      | 2.284   |
|               | 35:1        | 164.588                              | 36.473   | 28.858     | 14.835   | 152.526                               | 34.827   | 59.898     | 8.635   |
|               | 35:2        | 303.382                              | 82.358   | 31.450     | 15.670   | 120.364                               | 21.869   | 61.800     | 12.040  |
|               | 36:1        | 618.074                              | 144.735  | 144.996    | 62.279   | 659.900                               | 75.117   | 221.706    | 34.202  |
|               | 36:2        | 981.424                              | 264.408  | 250.332    | 115.948  | 789.164                               | 151.091  | 288.854    | 37.397  |
|               | 36:3        | 412.228                              | 125.357  | 80.608     | 40.000   | 213.204                               | 47.527   | 105.416    | 17.291  |

Supplementary Table ST1

| Lipid Species | Acyl carbon | Early Phase (nmol/g biofilm biomass) |         |            |         | Mature Phase (nmol/g biofilm biomass) |          |            |         |
|---------------|-------------|--------------------------------------|---------|------------|---------|---------------------------------------|----------|------------|---------|
|               |             | Biofilm                              |         | Planktonic |         | Biofilm                               |          | Planktonic |         |
|               |             | Mean                                 | SE      | Mean       | SE      | Mean                                  | SE       | Mean       | SE      |
|               | 36:4        | 221.360                              | 74.676  | 40.926     | 18.224  | 40.406                                | 16.953   | 48.502     | 10.144  |
|               | 36:5        | 40.194                               | 11.659  | 2.786      | 1.642   | 1.714                                 | 1.081    | 6.814      | 2.201   |
|               | 36:6        | 0.000                                | 0.000   | 0.742      | 0.554   | 0.260                                 | 0.260    | 0.000      | 0.000   |
|               | 38:0        | 0.000                                | 0.000   | 0.318      | 0.196   | 3.708                                 | 0.578    | 0.126      | 0.126   |
|               | 38:1        | 3.010                                | 1.070   | 0.000      | 0.000   | 4.076                                 | 2.330    | 0.252      | 0.154   |
|               | 38:2        | 4.696                                | 1.847   | 0.986      | 0.563   | 3.288                                 | 0.891    | 2.848      | 0.844   |
| PS            | 30:0        | 0.000                                | 0.000   | 2.596      | 1.481   | 53.220                                | 13.525   | 9.526      | 2.522   |
|               | 30:1        | 4.398                                | 1.643   | 2.184      | 0.893   | 30.304                                | 6.163    | 8.558      | 1.398   |
|               | 30:2        | 0.000                                | 0.000   | 0.000      | 0.000   | 5.228                                 | 3.604    | 6.700      | 3.610   |
|               | 32:0        | 0.000                                | 0.000   | 0.000      | 0.000   | 1.822                                 | 1.822    | 1.164      | 1.014   |
|               | 32:1        | 314.898                              | 61.393  | 131.448    | 72.745  | 2236.810                              | 536.882  | 629.890    | 116.446 |
|               | 32:2        | 22.216                               | 6.367   | 10.710     | 4.588   | 51.120                                | 10.261   | 32.042     | 5.826   |
|               | 33:0        | 0.000                                | 0.000   | 0.000      | 0.000   | 0.782                                 | 0.782    | 0.000      | 0.000   |
|               | 33:1        | 83.106                               | 21.290  | 18.032     | 9.920   | 360.728                               | 67.762   | 90.684     | 16.778  |
|               | 33:2        | 18.028                               | 6.080   | 4.822      | 2.610   | 27.018                                | 8.172    | 12.692     | 3.678   |
|               | 34:0        | 0.000                                | 0.000   | 0.000      | 0.000   | 0.000                                 | 0.000    | 0.000      | 0.000   |
|               | 34:1        | 674.964                              | 71.747  | 415.408    | 234.448 | 14374.356                             | 3198.662 | 2809.618   | 431.546 |
|               | 34:2        | 546.920                              | 131.449 | 170.696    | 94.051  | 2113.506                              | 635.813  | 800.728    | 124.991 |
|               | 34:3        | 49.070                               | 12.149  | 15.716     | 7.926   | 201.710                               | 70.042   | 94.594     | 13.214  |
|               | 34:4        | 1.006                                | 0.546   | 0.170      | 0.170   | 12.048                                | 7.826    | 6.448      | 2.612   |
|               | 35:0        | 3.424                                | 1.324   | 0.000      | 0.000   | 25.072                                | 14.487   | 3.044      | 1.127   |
|               | 35:1        | 0.000                                | 0.000   | 0.000      | 0.000   | 0.260                                 | 0.260    | 0.000      | 0.000   |
|               | 35:2        | 17.198                               | 5.002   | 2.558      | 1.078   | 100.370                               | 25.014   | 19.456     | 1.606   |
|               | 36:0        | 0.000                                | 0.000   | 0.074      | 0.074   | 0.170                                 | 0.170    | 0.502      | 0.365   |
|               | 36:1        | 49.162                               | 11.876  | 11.340     | 7.480   | 298.030                               | 72.802   | 43.474     | 6.505   |
|               | 36:2        | 36.514                               | 8.376   | 9.026      | 6.380   | 397.840                               | 113.434  | 49.098     | 8.769   |
|               | 36:3        | 14.622                               | 5.275   | 0.340      | 0.340   | 61.334                                | 19.482   | 21.886     | 4.364   |
|               | 36:4        | 2.134                                | 1.029   | 2.406      | 1.913   | 34.098                                | 14.278   | 8.776      | 1.377   |
|               | 36:5        | 1.496                                | 1.398   | 0.286      | 0.286   | 6.788                                 | 3.596    | 2.826      | 1.532   |
|               | 36:6        | 1.714                                | 1.561   | 0.000      | 0.000   | 0.000                                 | 0.000    | 0.000      | 0.000   |
| 38:1          | 0.000       | 0.000                                | 0.000   | 0.000      | 0.232   | 0.232                                 | 0.126    | 0.126      |         |
| 38:2          | 0.000       | 0.000                                | 0.000   | 0.000      | 0.000   | 0.000                                 | 0.000    | 0.000      |         |

Supplementary Table ST1

| Lipid Species | Acyl carbon | Early Phase (nmol/g biofilm biomass) |         |            |         | Mature Phase (nmol/g biofilm biomass) |         |            |         |
|---------------|-------------|--------------------------------------|---------|------------|---------|---------------------------------------|---------|------------|---------|
|               |             | Biofilm                              |         | Planktonic |         | Biofilm                               |         | Planktonic |         |
|               |             | Mean                                 | SE      | Mean       | SE      | Mean                                  | SE      | Mean       | SE      |
|               | 38:3        | 0.000                                | 0.000   | 0.000      | 0.000   | 0.000                                 | 0.000   | 0.000      | 0.000   |
|               | 38:4        | 0.000                                | 0.000   | 0.000      | 0.000   | 17.176                                | 13.778  | 5.372      | 2.442   |
|               | 38:5        | 0.166                                | 0.102   | 0.000      | 0.000   | 13.826                                | 5.396   | 9.770      | 3.574   |
|               | 38:6        | 0.918                                | 0.559   | 0.000      | 0.000   | 0.832                                 | 0.351   | 0.376      | 0.250   |
|               | 40:1        | 0.126                                | 0.126   | 0.340      | 0.340   | 0.520                                 | 0.520   | 0.000      | 0.000   |
|               | 40:2        | 0.472                                | 0.472   | 0.170      | 0.170   | 0.000                                 | 0.000   | 0.876      | 0.545   |
|               | 40:3        | 0.000                                | 0.000   | 0.000      | 0.000   | 0.000                                 | 0.000   | 0.000      | 0.000   |
|               | 40:4        | 0.000                                | 0.000   | 0.000      | 0.000   | 0.000                                 | 0.000   | 0.000      | 0.000   |
|               | 42:1        | 0.000                                | 0.000   | 0.000      | 0.000   | 0.000                                 | 0.000   | 0.250      | 0.250   |
|               | 42:2        | 0.126                                | 0.126   | 0.000      | 0.000   | 1.042                                 | 1.042   | 0.000      | 0.000   |
|               | 42:3        | 0.000                                | 0.000   | 0.000      | 0.000   | 0.000                                 | 0.000   | 0.000      | 0.000   |
|               | 42:4        | 0.000                                | 0.000   | 0.000      | 0.000   | 0.000                                 | 0.000   | 0.250      | 0.250   |
|               | 44:2        | 0.000                                | 0.000   | 0.000      | 0.000   | 1.870                                 | 1.870   | 0.000      | 0.000   |
|               | 44:3        | 0.000                                | 0.000   | 0.000      | 0.000   | 0.000                                 | 0.000   | 2.876      | 2.876   |
|               | PA          | 32:0                                 | 2.460   | 2.361      | 3.760   | 2.651                                 | 31.636  | 10.695     | 4.506   |
| 32:1          |             | 410.296                              | 88.227  | 250.824    | 96.974  | 1054.754                              | 190.442 | 348.100    | 62.750  |
| 32:2          |             | 151.544                              | 30.874  | 57.914     | 23.771  | 362.490                               | 112.500 | 110.536    | 15.386  |
| 34:1          |             | 1538.764                             | 318.932 | 609.776    | 217.948 | 3780.920                              | 645.481 | 955.922    | 156.013 |
| 34:2          |             | 1291.526                             | 294.547 | 541.722    | 201.908 | 2289.192                              | 566.429 | 753.006    | 117.515 |
| 34:3          |             | 210.382                              | 36.973  | 97.502     | 39.097  | 399.874                               | 121.150 | 150.140    | 27.119  |
| 34:4          |             | 14.638                               | 3.198   | 2.740      | 1.556   | 8.234                                 | 2.097   | 3.960      | 1.205   |
| 34:5          |             | 0.000                                | 0.000   | 0.000      | 0.000   | 0.000                                 | 0.000   | 1.626      | 1.179   |
| 34:6          |             | 0.000                                | 0.000   | 0.000      | 0.000   | 0.000                                 | 0.000   | 0.000      | 0.000   |
| 36:1          |             | 117.894                              | 28.189  | 45.586     | 15.552  | 425.582                               | 95.766  | 84.478     | 8.396   |
| 36:2          |             | 336.606                              | 62.352  | 149.954    | 63.286  | 1313.296                              | 383.866 | 314.144    | 57.835  |
| 36:3          |             | 148.754                              | 37.161  | 79.214     | 29.567  | 438.542                               | 171.198 | 166.888    | 38.253  |
| 36:4          |             | 55.348                               | 14.846  | 24.698     | 8.709   | 114.172                               | 41.811  | 59.614     | 13.807  |
| 36:5          |             | 2.754                                | 0.897   | 2.514      | 1.228   | 0.510                                 | 0.340   | 3.202      | 1.373   |
| 36:6          |             | 0.000                                | 0.000   | 0.170      | 0.170   | 1.042                                 | 1.042   | 0.000      | 0.000   |
| PG            | 30:0        | 0.396                                | 0.396   | 7.890      | 4.225   | 7.906                                 | 2.946   | 1.394      | 0.510   |
|               | 30:1        | 0.522                                | 0.384   | 0.742      | 0.554   | 2.062                                 | 0.852   | 1.002      | 0.423   |
|               | 32:0        | 2.024                                | 1.394   | 4.434      | 1.916   | 17.092                                | 10.000  | 0.626      | 0.626   |

Supplementary Table ST1

| Lipid Species | Acyl carbon | Early Phase (nmol/g biofilm biomass) |         |            |        | Mature Phase (nmol/g biofilm biomass) |          |            |         |
|---------------|-------------|--------------------------------------|---------|------------|--------|---------------------------------------|----------|------------|---------|
|               |             | Biofilm                              |         | Planktonic |        | Biofilm                               |          | Planktonic |         |
|               |             | Mean                                 | SE      | Mean       | SE     | Mean                                  | SE       | Mean       | SE      |
|               | 32:1        | 207.582                              | 60.216  | 59.318     | 28.333 | 274.474                               | 66.505   | 64.484     | 8.426   |
|               | 32:2        | 28.092                               | 12.605  | 4.414      | 1.807  | 26.968                                | 17.472   | 5.418      | 1.739   |
|               | 34:0        | 1.034                                | 0.770   | 0.572      | 0.572  | 0.000                                 | 0.000    | 0.000      | 0.000   |
|               | 34:1        | 543.602                              | 147.896 | 107.896    | 42.463 | 1223.966                              | 245.203  | 233.122    | 34.125  |
|               | 34:2        | 762.480                              | 296.399 | 120.420    | 47.265 | 475.208                               | 126.144  | 142.140    | 17.055  |
|               | 34:3        | 67.524                               | 24.575  | 11.110     | 7.109  | 66.538                                | 25.469   | 18.790     | 2.859   |
|               | 34:4        | 6.256                                | 4.063   | 0.170      | 0.170  | 1.734                                 | 0.902    | 0.750      | 0.500   |
|               | 36:1        | 8.486                                | 1.586   | 1.020      | 1.020  | 20.028                                | 5.965    | 1.626      | 0.781   |
|               | 36:2        | 32.662                               | 11.142  | 5.234      | 2.785  | 67.284                                | 13.755   | 7.622      | 2.090   |
|               | 36:3        | 16.504                               | 8.071   | 2.188      | 0.860  | 31.398                                | 13.823   | 5.994      | 0.837   |
|               | 36:4        | 29.308                               | 12.790  | 2.634      | 0.908  | 24.010                                | 7.119    | 6.042      | 2.065   |
|               | 38:5        | 0.000                                | 0.000   | 0.000      | 0.000  | 0.000                                 | 0.000    | 0.126      | 0.126   |
|               | 38:6        | 0.000                                | 0.000   | 0.000      | 0.000  | 0.752                                 | 0.514    | 0.000      | 0.000   |
| IPC           | 42:0-2      | 165.558                              | 40.836  | 42.734     | 26.141 | 506.452                               | 221.230  | 60.820     | 12.460  |
|               | 42:0-3      | 542.382                              | 142.018 | 46.094     | 27.446 | 954.666                               | 391.502  | 160.234    | 33.806  |
|               | 42:0-4      | 115.342                              | 29.133  | 10.936     | 6.048  | 447.912                               | 187.875  | 135.322    | 36.527  |
|               | 43:0-3      | 46.218                               | 12.572  | 2.062      | 1.075  | 104.912                               | 40.362   | 14.360     | 4.657   |
|               | 44:0-2      | 125.568                              | 36.210  | 44.470     | 26.333 | 529.034                               | 224.023  | 39.420     | 9.705   |
|               | 44:0-3      | 368.918                              | 84.988  | 55.622     | 32.384 | 2595.668                              | 1015.898 | 419.360    | 123.830 |
|               | 44:0-4      | 33.822                               | 9.316   | 12.094     | 6.500  | 690.530                               | 293.767  | 135.990    | 37.951  |
|               | 45:0-3      | 16.686                               | 3.700   | 2.056      | 1.145  | 200.012                               | 65.393   | 20.270     | 6.888   |
|               | 46:0-2      | 0.352                                | 0.298   | 0.208      | 0.106  | 21.766                                | 4.609    | 0.140      | 0.074   |
|               | 46:0-3      | 5.290                                | 0.832   | 0.588      | 0.336  | 186.092                               | 63.898   | 18.990     | 6.941   |
|               | 46:0-4      | 0.530                                | 0.326   | 0.102      | 0.083  | 58.616                                | 26.903   | 8.056      | 2.799   |
| MIPC          | 42:0-2      | 101.886                              | 24.445  | 13.504     | 7.313  | 107.568                               | 21.367   | 12.302     | 3.737   |
|               | 42:0-3      | 1444.966                             | 371.884 | 68.482     | 37.050 | 1040.546                              | 226.761  | 195.464    | 44.170  |
|               | 42:0-4      | 267.884                              | 68.657  | 21.778     | 11.313 | 466.454                               | 129.978  | 126.074    | 31.939  |
|               | 43:0-3      | 175.674                              | 41.733  | 6.020      | 2.965  | 160.568                               | 37.365   | 20.436     | 5.268   |
|               | 44:0-2      | 128.668                              | 39.753  | 27.184     | 15.825 | 183.172                               | 32.017   | 14.782     | 3.639   |
|               | 44:0-3      | 1227.792                             | 317.057 | 135.138    | 76.936 | 3818.778                              | 793.261  | 575.822    | 148.191 |
|               | 44:0-4      | 136.428                              | 33.814  | 33.992     | 18.187 | 663.828                               | 208.121  | 88.410     | 22.957  |
|               | 45:0-3      | 111.930                              | 32.930  | 9.082      | 4.561  | 331.462                               | 65.886   | 29.250     | 8.261   |



Supplementary Table ST1

| Lipid Species | Acyl carbon | Early Phase (nmol/g biofilm biomass) |        |            |       | Mature Phase (nmol/g biofilm biomass) |        |            |        |
|---------------|-------------|--------------------------------------|--------|------------|-------|---------------------------------------|--------|------------|--------|
|               |             | Biofilm                              |        | Planktonic |       | Biofilm                               |        | Planktonic |        |
|               |             | Mean                                 | SE     | Mean       | SE    | Mean                                  | SE     | Mean       | SE     |
|               | 46:0-2      | 0.732                                | 0.357  | 0.000      | 0.000 | 7.456                                 | 1.239  | 0.054      | 0.054  |
|               | 46:0-3      | 57.106                               | 12.980 | 6.684      | 3.603 | 371.466                               | 81.126 | 37.590     | 12.157 |
|               | 46:0-4      | 10.816                               | 3.130  | 1.718      | 0.955 | 70.514                                | 22.654 | 5.570      | 2.137  |
| MIP2C         | 42:0-2      | 0.000                                | 0.000  | 0.000      | 0.000 | 0.000                                 | 0.000  | 0.360      | 0.261  |
|               | 42:0-3      | 0.000                                | 0.000  | 0.030      | 0.030 | 0.000                                 | 0.000  | 2.168      | 1.290  |
|               | 42:0-4      | 0.000                                | 0.000  | 0.000      | 0.000 | 0.000                                 | 0.000  | 0.062      | 0.062  |
|               | 43:0-3      | 0.000                                | 0.000  | 0.026      | 0.026 | 0.000                                 | 0.000  | 0.054      | 0.054  |
|               | 44:0-2      | 0.034                                | 0.034  | 0.000      | 0.000 | 0.000                                 | 0.000  | 0.000      | 0.000  |
|               | 44:0-3      | 0.816                                | 0.434  | 0.000      | 0.000 | 0.000                                 | 0.000  | 8.104      | 2.174  |
|               | 44:0-4      | 0.000                                | 0.000  | 0.000      | 0.000 | 0.000                                 | 0.000  | 0.026      | 0.026  |
|               | 45:0-3      | 0.000                                | 0.000  | 0.000      | 0.000 | 0.000                                 | 0.000  | 0.000      | 0.000  |
|               | 46:0-2      | 0.000                                | 0.000  | 0.000      | 0.000 | 0.000                                 | 0.000  | 0.026      | 0.026  |
|               | 46:0-3      | 0.000                                | 0.000  | 0.000      | 0.000 | 0.000                                 | 0.000  | 0.000      | 0.000  |
|               | 46:0-4      | 0.000                                | 0.000  | 0.000      | 0.000 | 0.000                                 | 0.000  | 0.000      | 0.000  |
